# Supplementary material
Source: Springer Nature journal article supplement (https://www.springermedizin.de/resource/supplementary/12885_2011_3252_MOESM2_ESM.pdf/9463116)

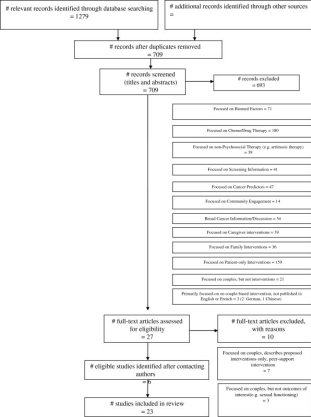

Supplement: MOESM2 [file 9463116]
